# Supplementary material for: RASA1 inhibits the progression of renal cell carcinoma by decreasing the expression of miR-223-3p and promoting the expression of FBXW7
Source: Oxford University Press journal article supplement (doi:10.1042/bsr20194143), 2020-06-26
Supplement: bsr-2019-4143_supp.pdf [file bsr-2019-4143_supp.pdf]

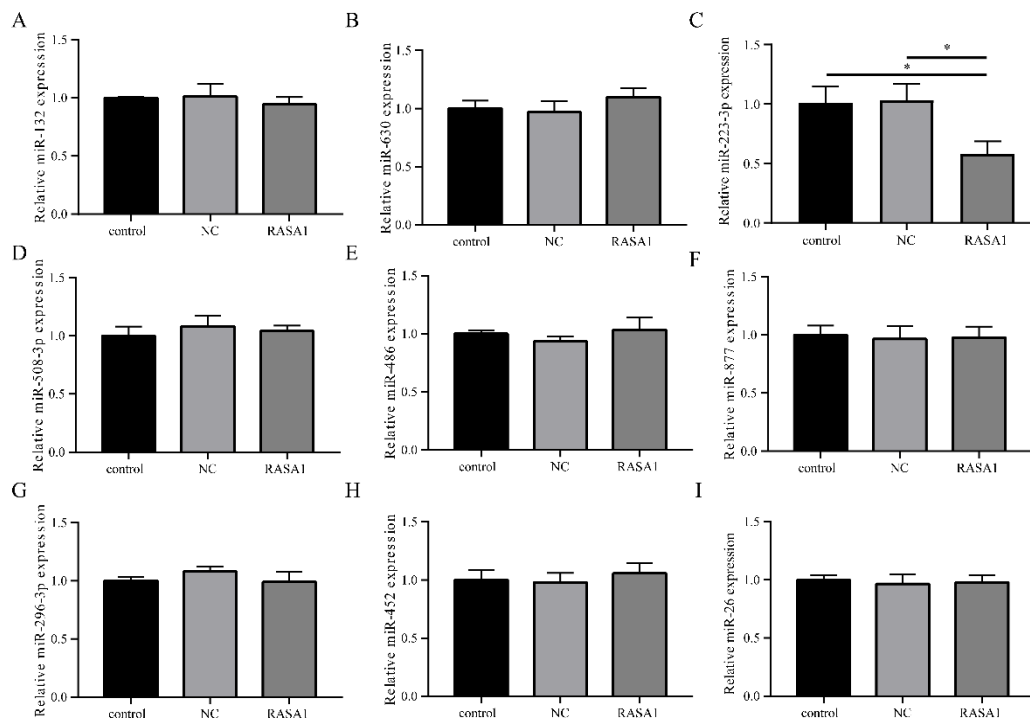

Supplement Figure 1: The effect of *RASA1* on the expression of some renal cancer-associated miRNAs is detected in 786-0 cells. Except for miR-223-3p, no obvious differences are found in other indexes.  $P < 0.05$ ,  $**P < 0.01$ ,  $***P < 0.001$ .
